# Supplementary material
Source: publisher site journal article supplement (https://www.dovepress.com/article/450324)
Supplement: Supplementary file 1 [file get_supplementary_file.php]

**Figure S1. ROS raw data**

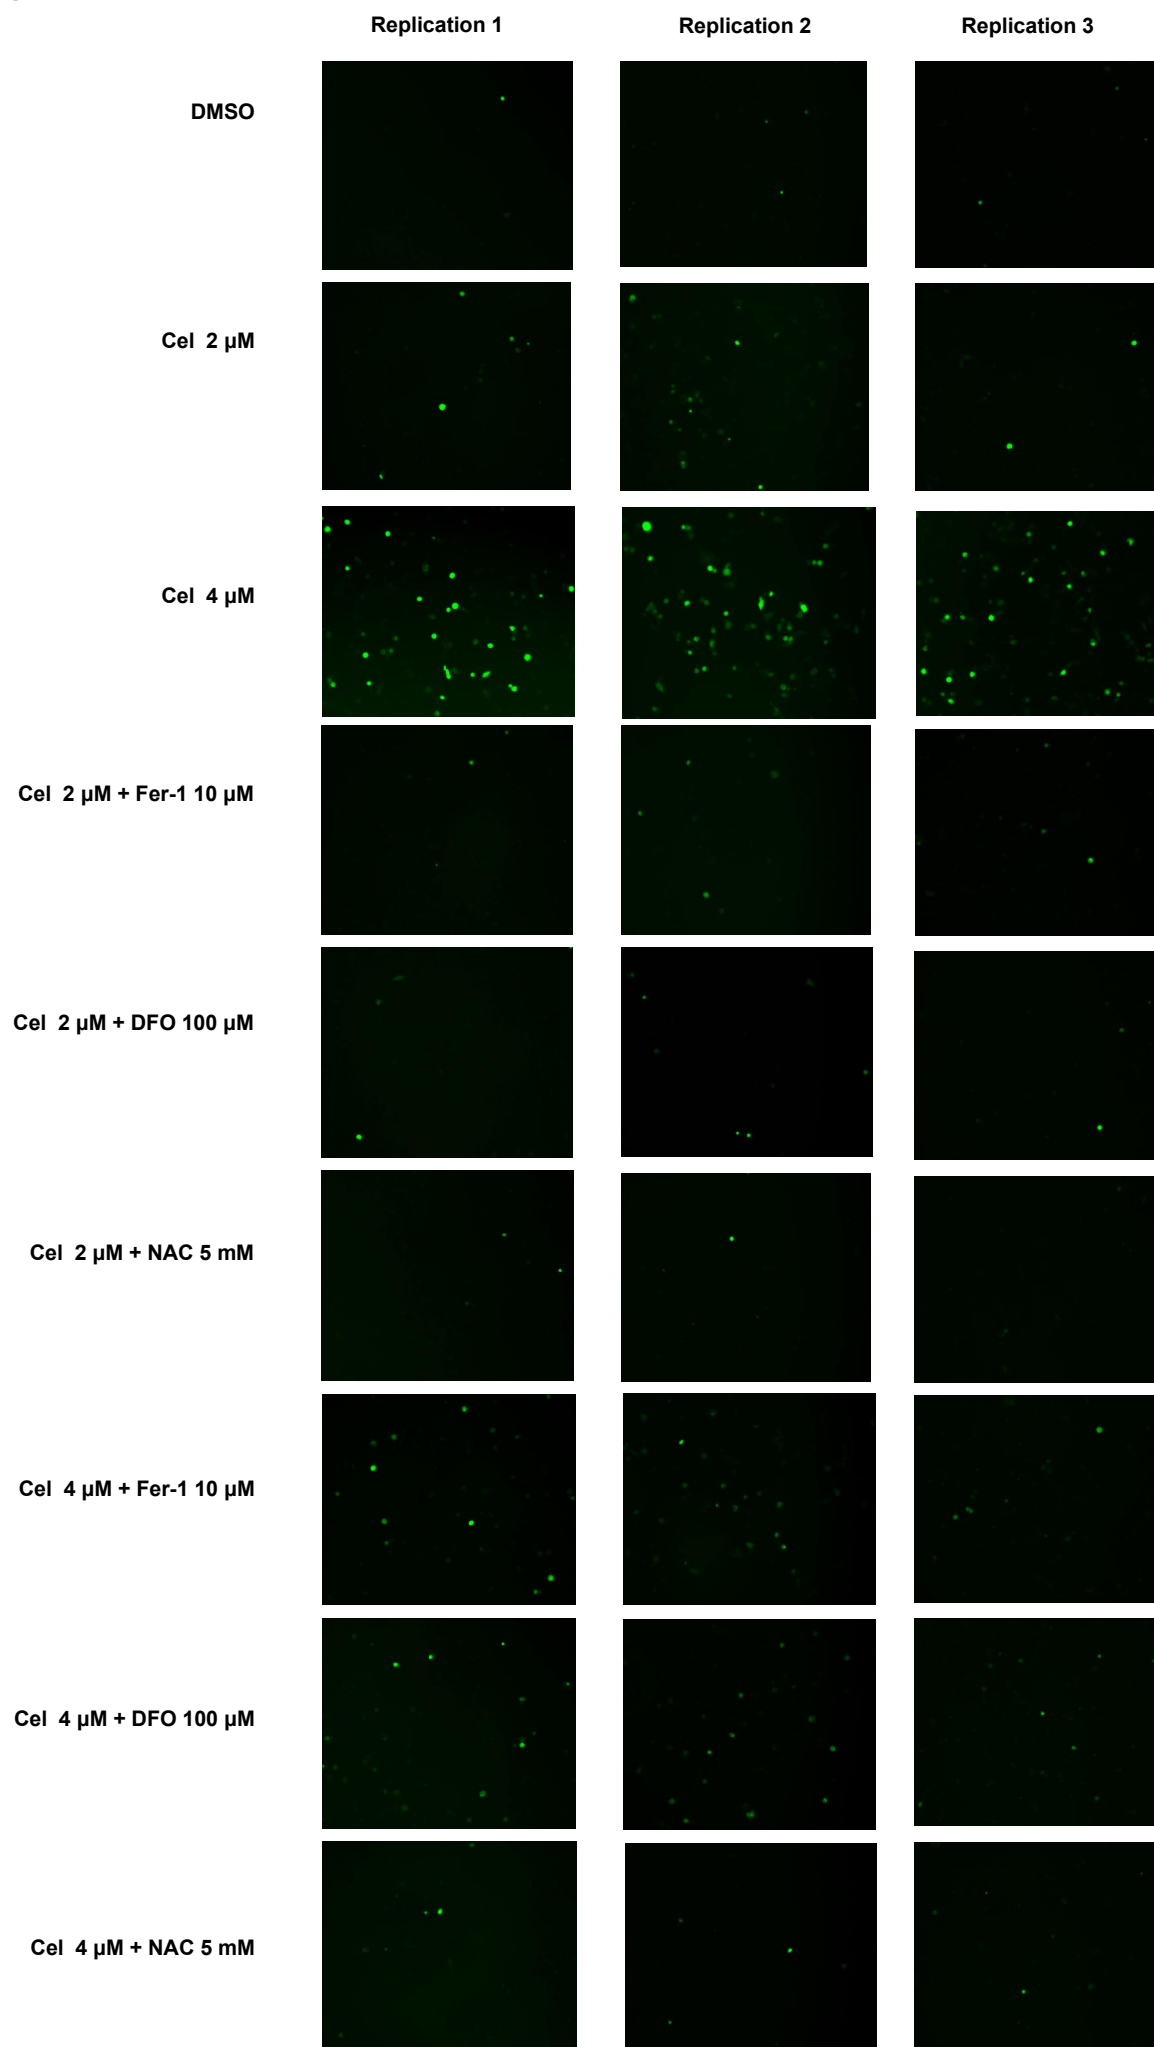

Replication 4

Replication 5

DMSO

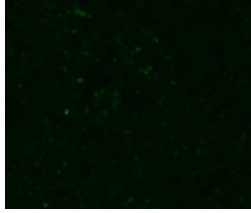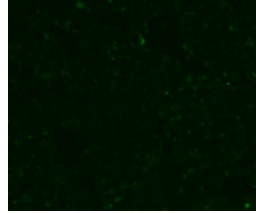

Cel 2  $\mu$ M

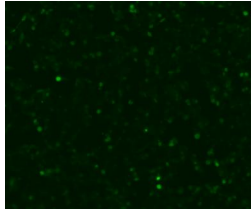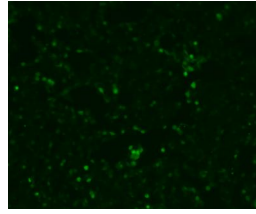

Cel 4  $\mu$ M

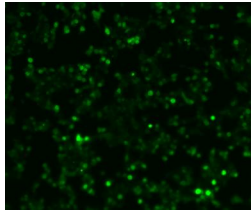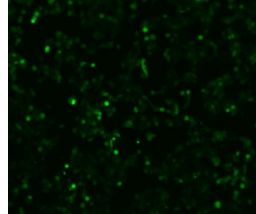

Cel 2  $\mu$ M + Fer-1 10  $\mu$ M

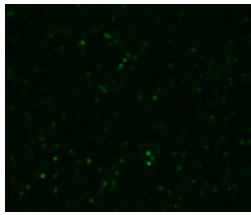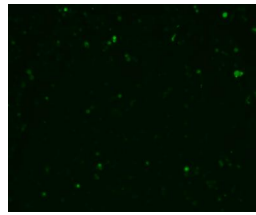

Cel 2  $\mu$ M + DFO 100  $\mu$ M

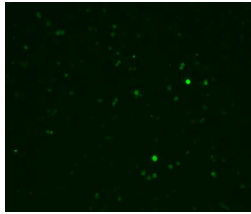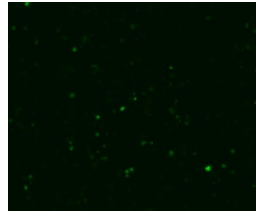

Cel 2  $\mu$ M + NAC 5 mM

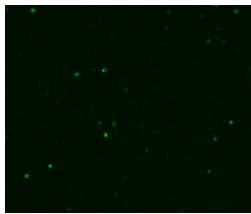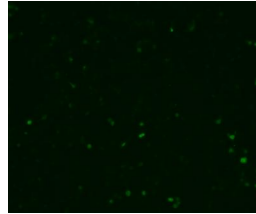

Cel 4  $\mu$ M + Fer-1 10  $\mu$ M

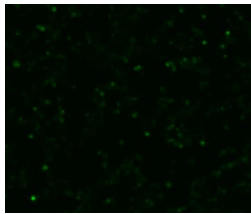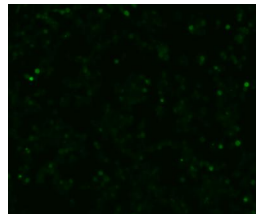

Cel 4  $\mu$ M + DFO 100  $\mu$ M

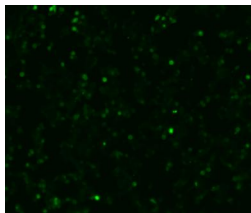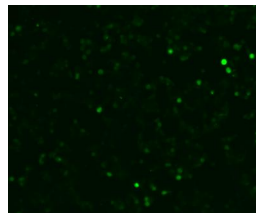

Cel 4  $\mu$ M + NAC 5 mM

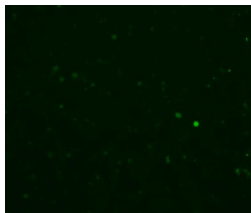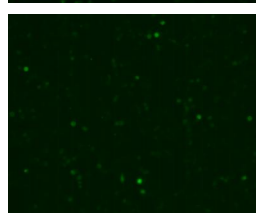

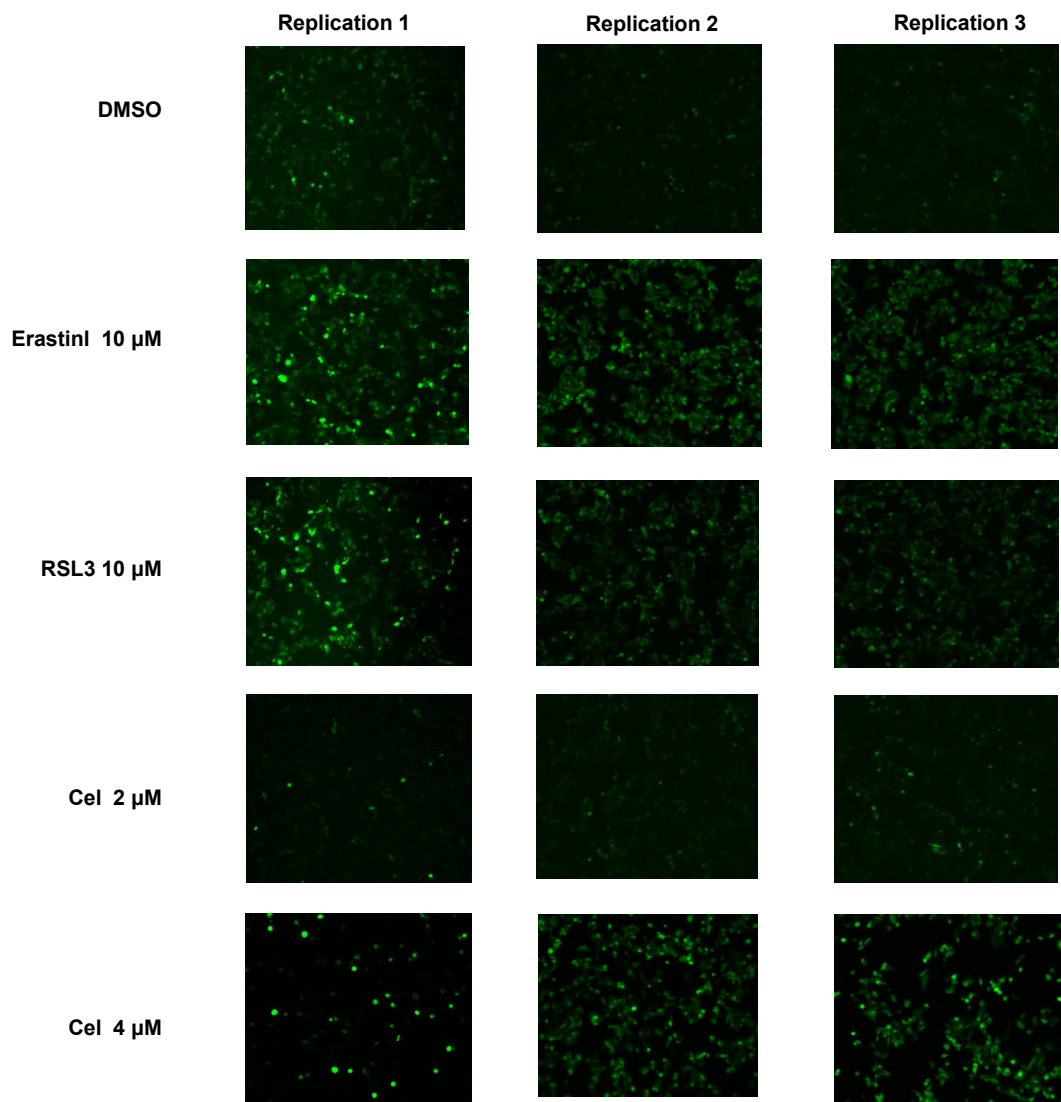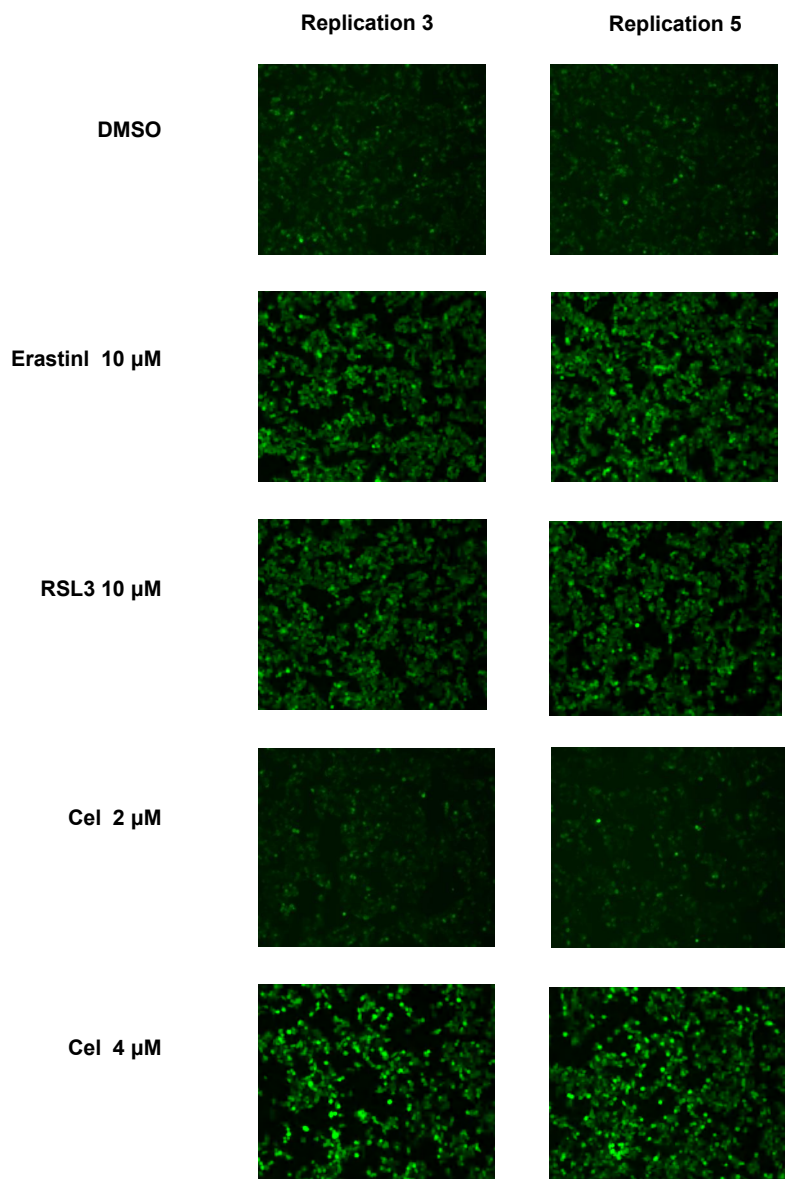

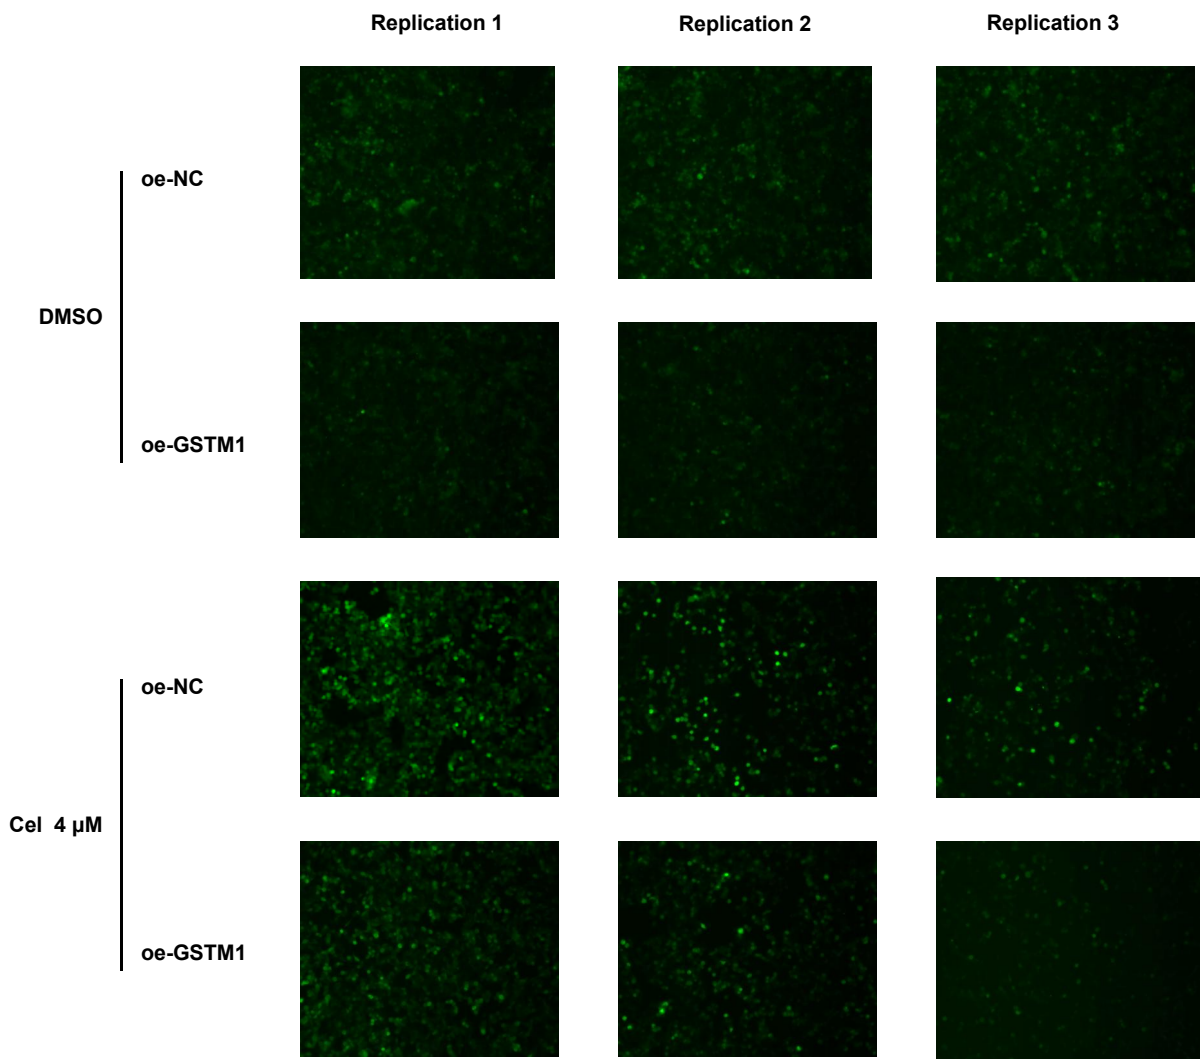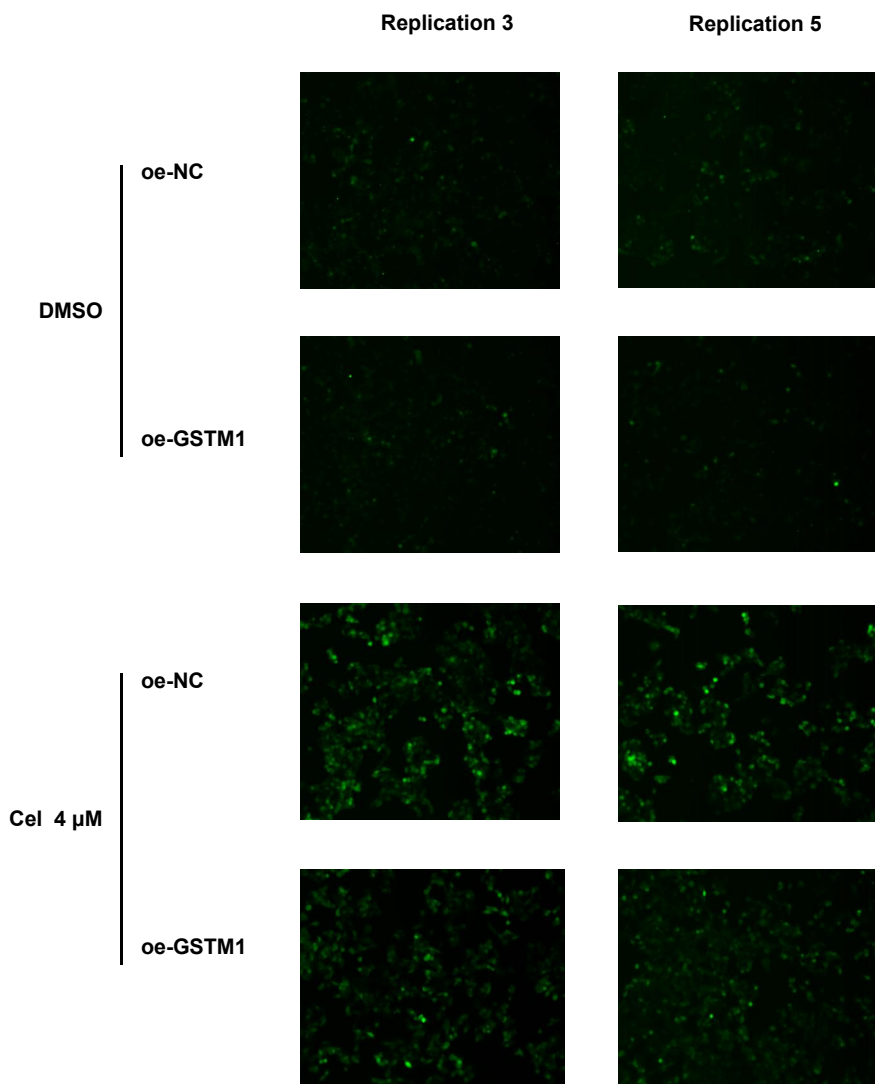

**Figure S2.** clone formation raw data

Replication 1

Replication 2

Replication 3

Replication 4

DMSO

Cel 2  $\mu$ M

Cel 4  $\mu$ M

Cel 2  $\mu$ M + Fer-1 10  $\mu$ M

Cel 2  $\mu$ M + DFO 100  $\mu$ M

Cel 2  $\mu$ M + NAC 5 mM

Cel 4  $\mu$ M + Fer-1 10  $\mu$ M

Cel 4  $\mu$ M + DFO 100  $\mu$ M

Cel 4  $\mu$ M + NAC 5 mM

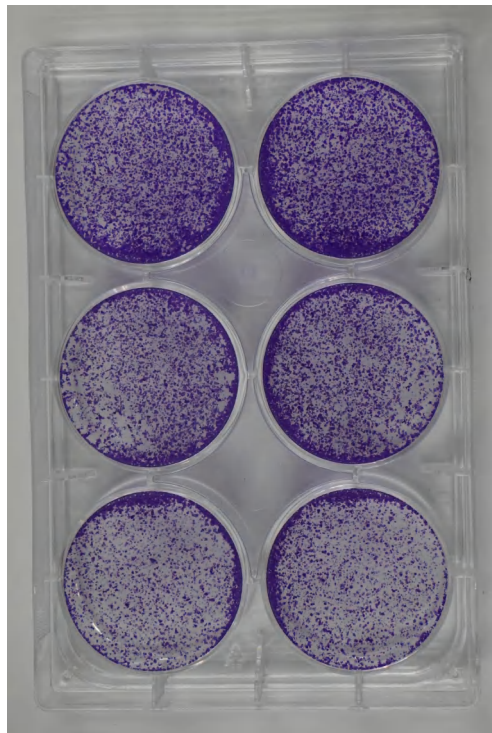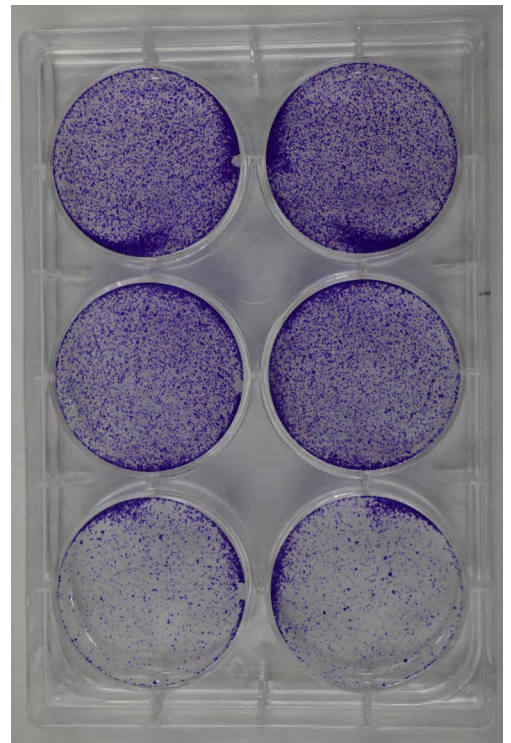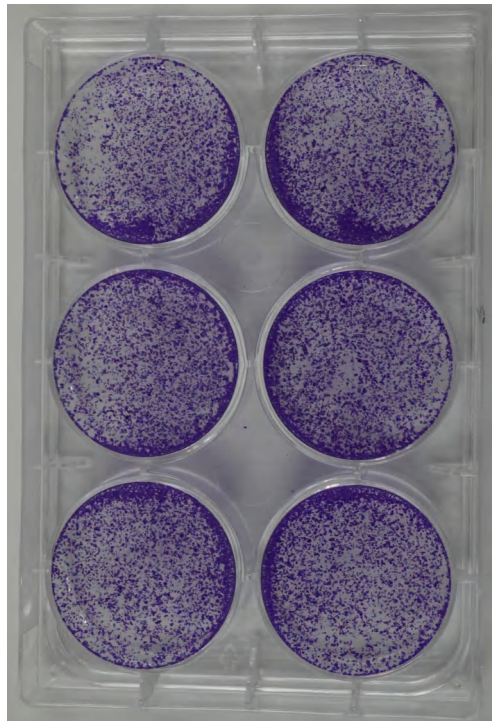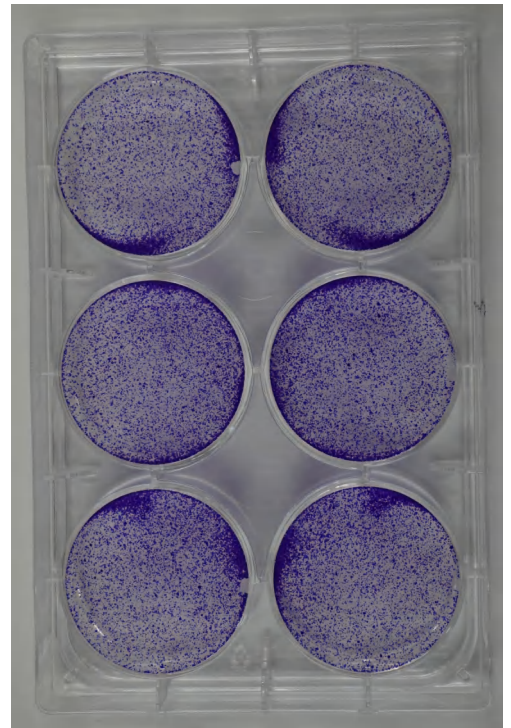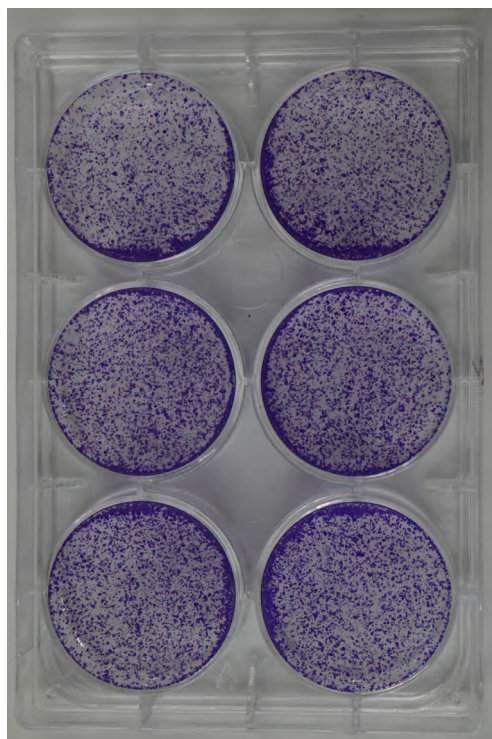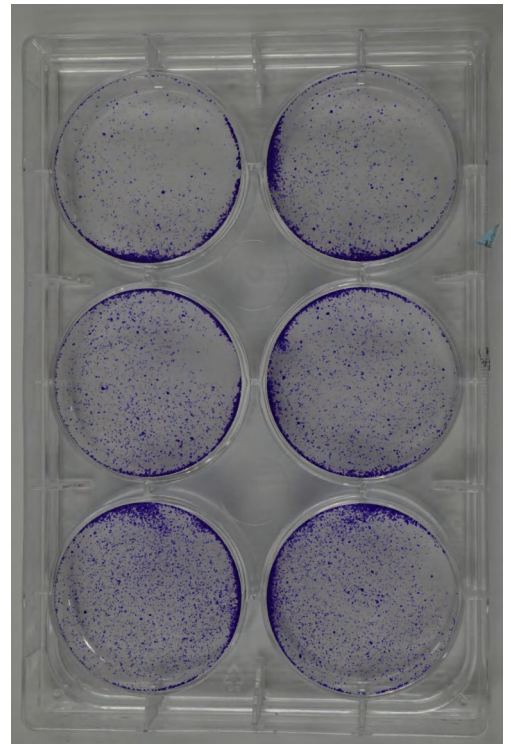

Replication 5

Replication 6

DMSO

Cel 2  $\mu$ M

Cel 4  $\mu$ M

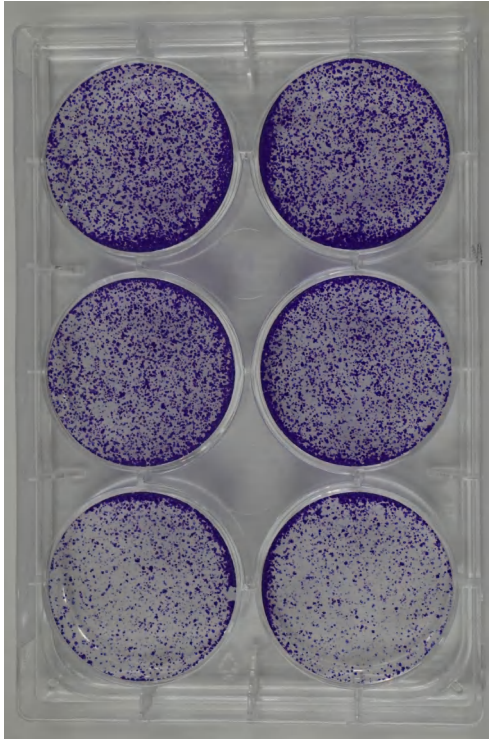

Cel 2  $\mu$ M + Fer-1 10  $\mu$ M

Cel 2  $\mu$ M + DFO 100  $\mu$ M

Cel 2  $\mu$ M + NAC 5 mM

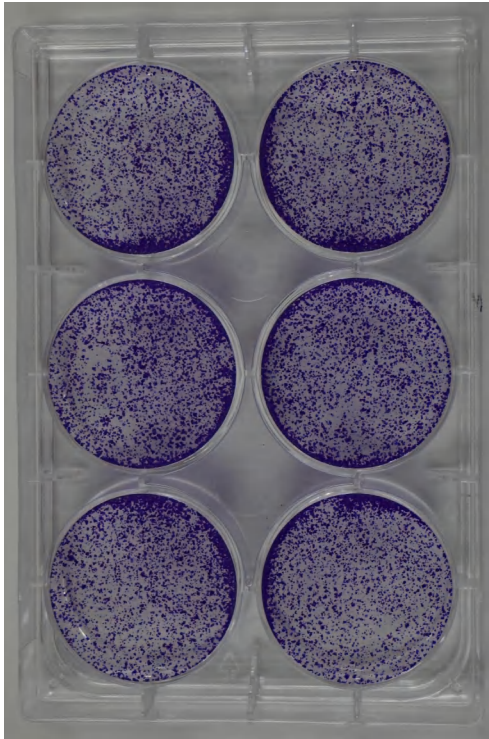

Cel 4  $\mu$ M + Fer-1 10  $\mu$ M

Cel 4  $\mu$ M + DFO 100  $\mu$ M

Cel 4  $\mu$ M + NAC 5 mM

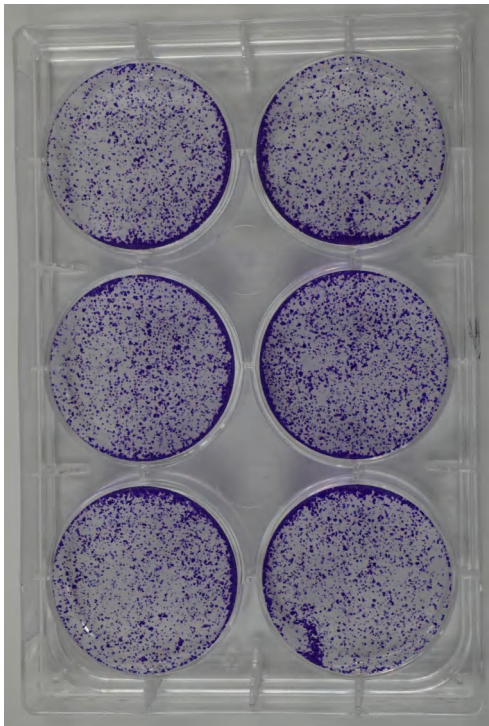

**Figure S3. EDU raw data**

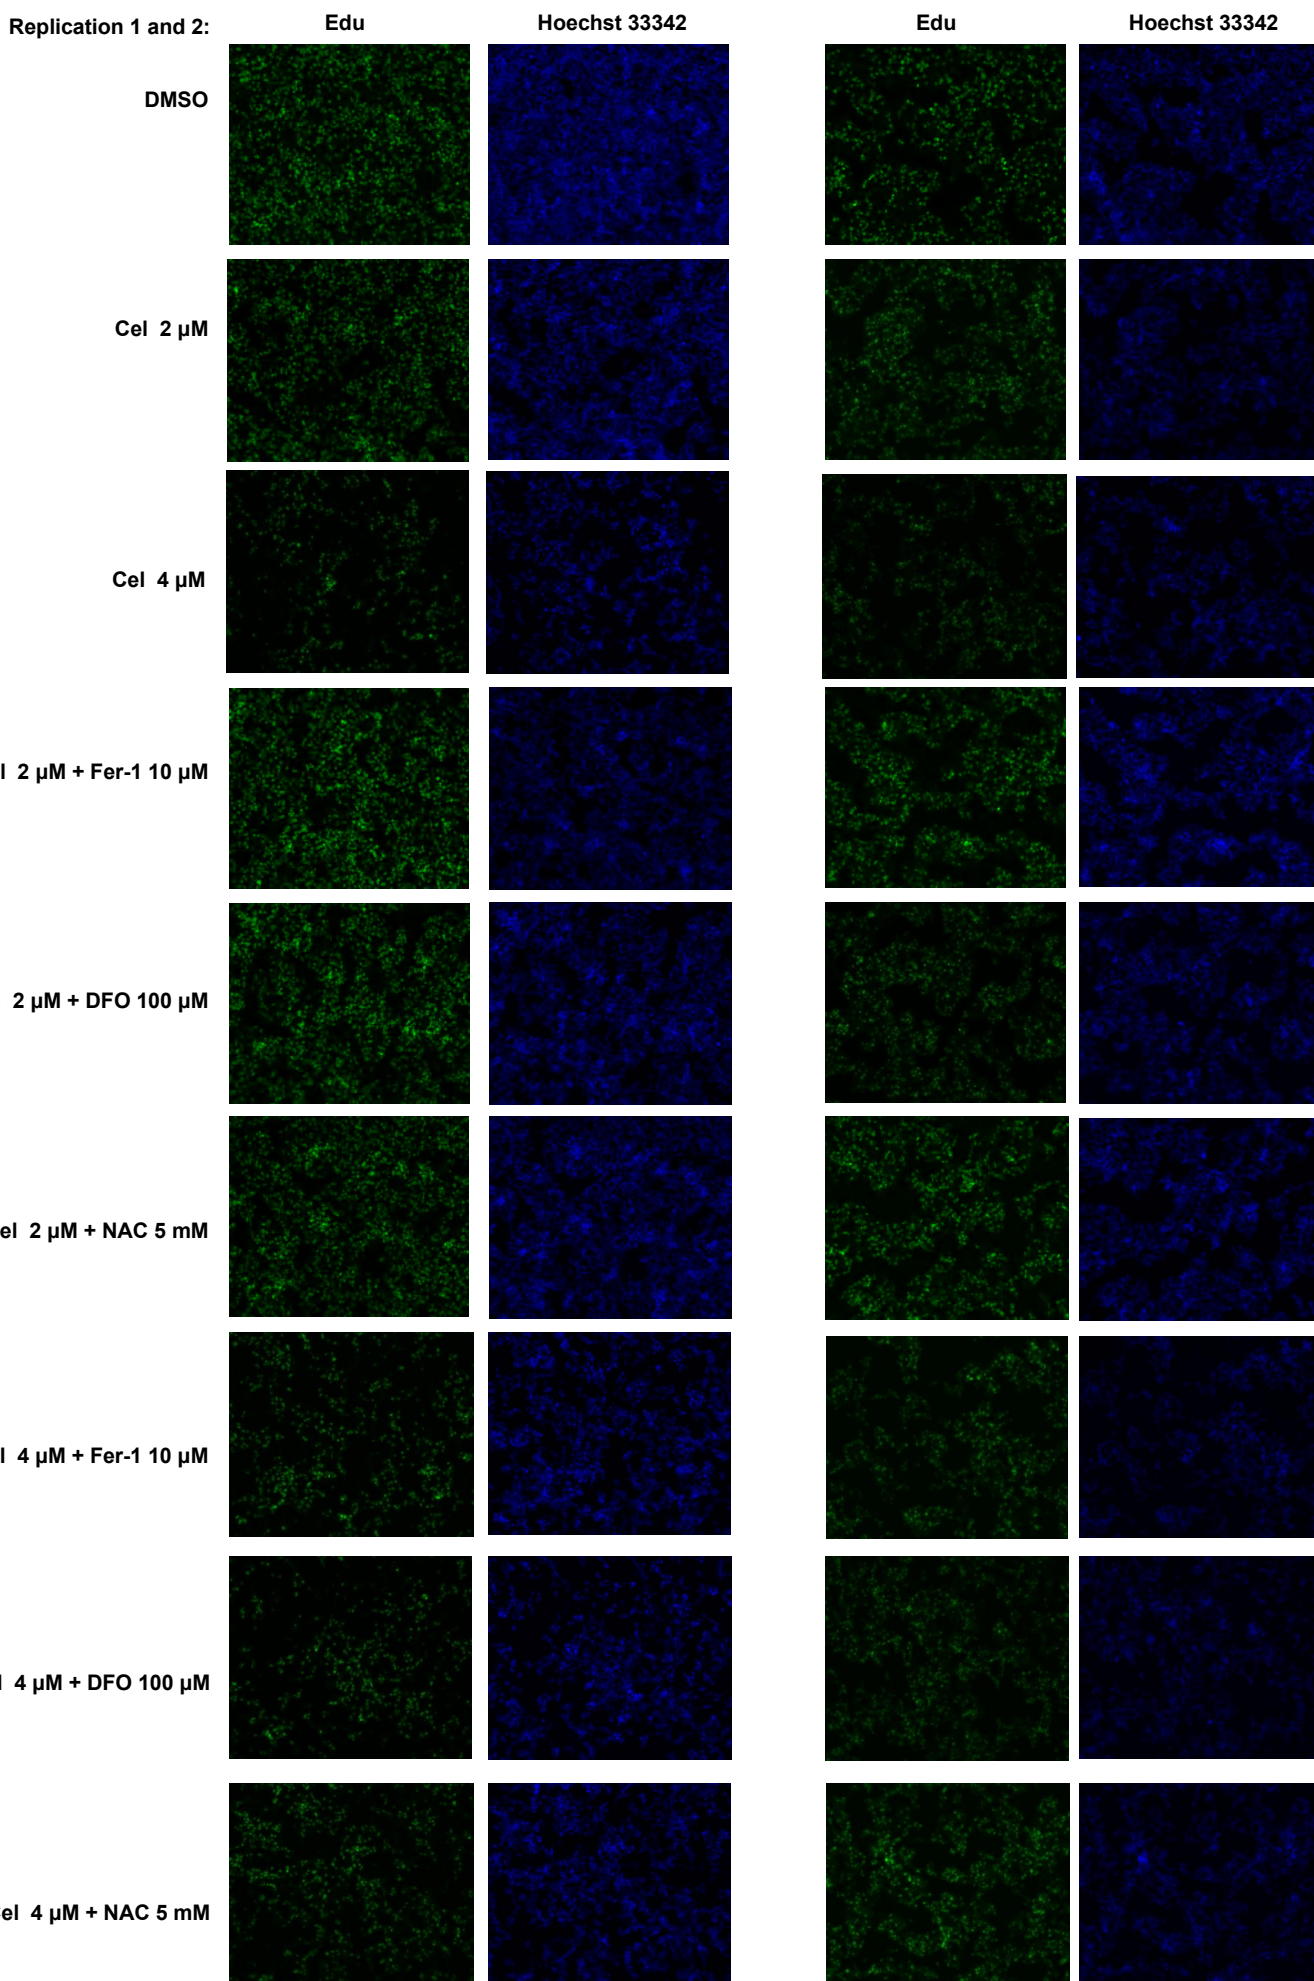

Replication 3 and 4:

Edu

Hoechst 33342

Edu

Hoechst 33342

DMSO

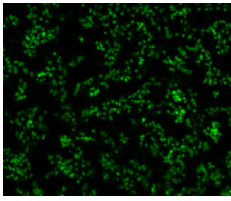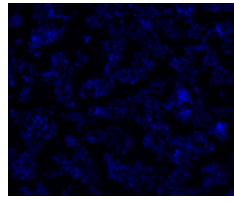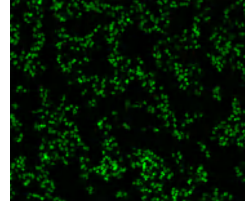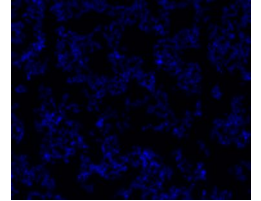

Cel 2  $\mu$ M

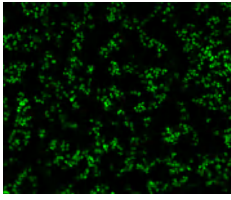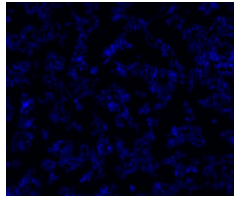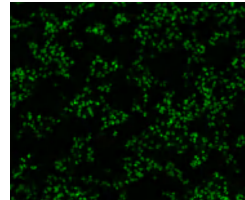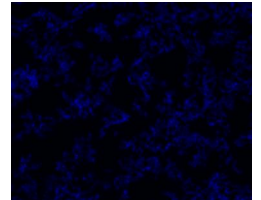

Cel 4  $\mu$ M

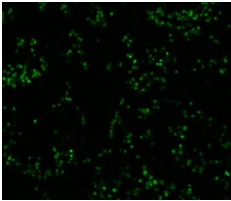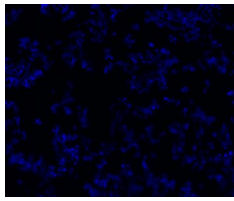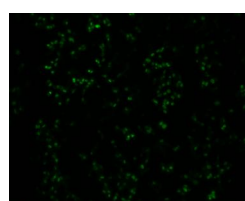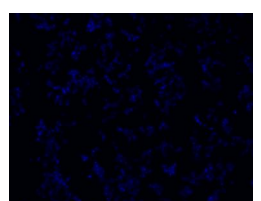

Cel 2  $\mu$ M + Fer-1 10  $\mu$ M

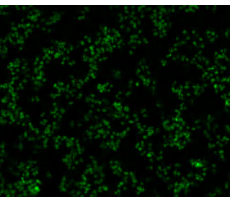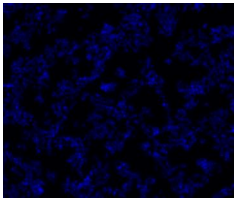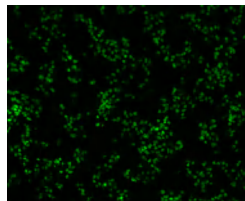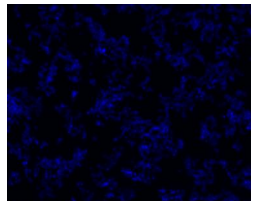

Cel 2  $\mu$ M + DFO 100  $\mu$ M

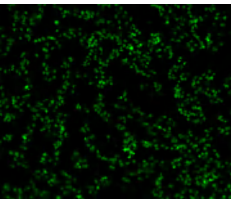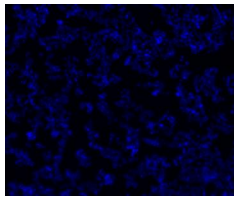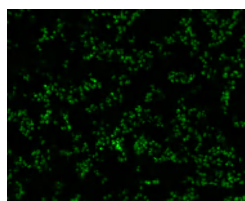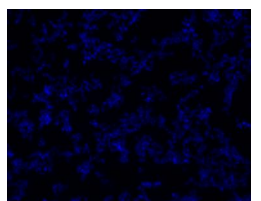

Cel 2  $\mu$ M + NAC 5 mM

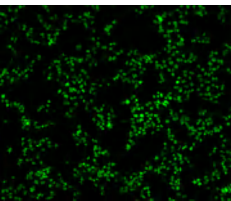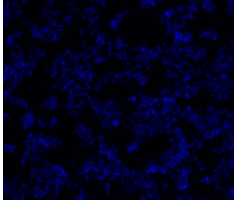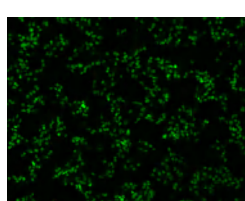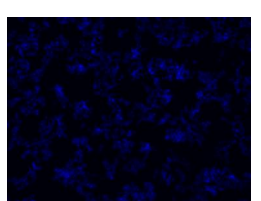

Cel 4  $\mu$ M + Fer-1 10  $\mu$ M

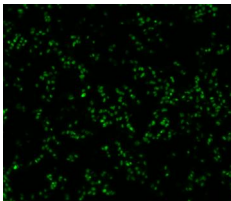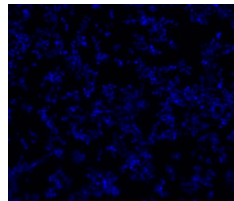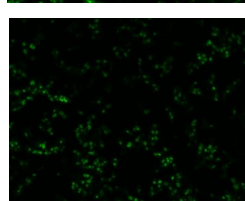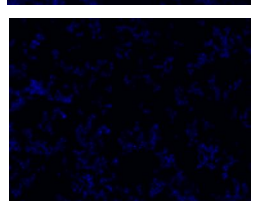

Cel 4  $\mu$ M + DFO 100  $\mu$ M

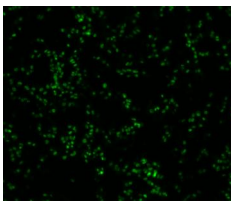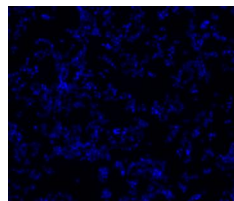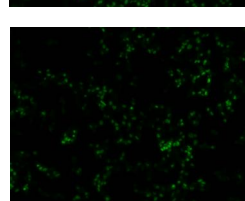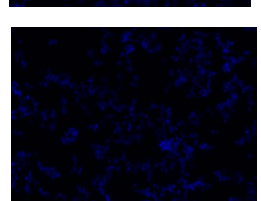

Cel 4  $\mu$ M + NAC 5 mM

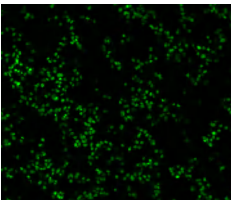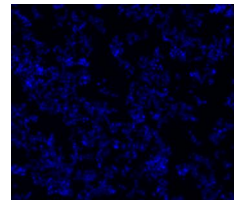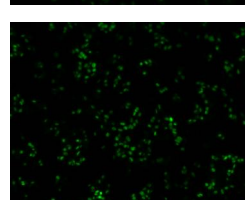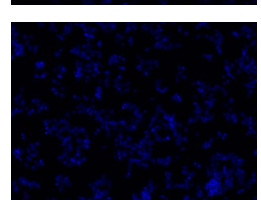



Replication 5:

Edu

Hoechst 33342

DMSO

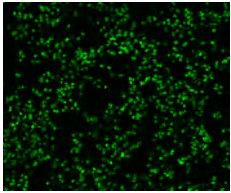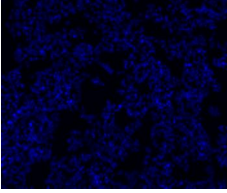

Cel 2  $\mu$ M

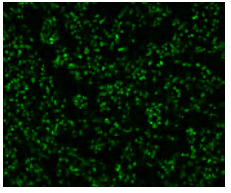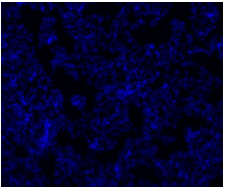

Cel 4  $\mu$ M

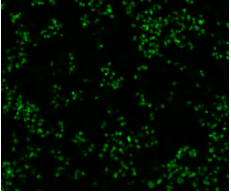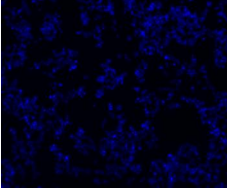

Cel 2  $\mu$ M + Fer-1 10  $\mu$ M

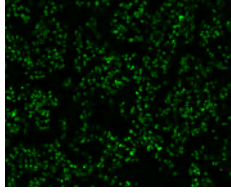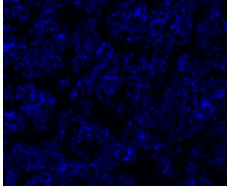

Cel 2  $\mu$ M + DFO 100  $\mu$ M

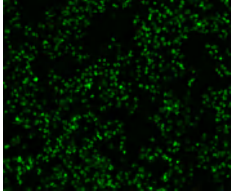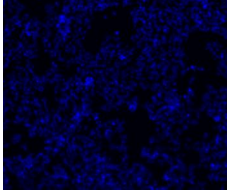

Cel 2  $\mu$ M + NAC 5 mM

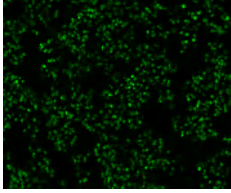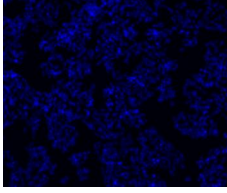

Cel 4  $\mu$ M + Fer-1 10  $\mu$ M

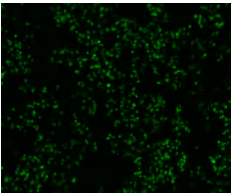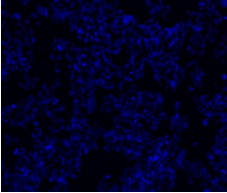

Cel 4  $\mu$ M + DFO 100  $\mu$ M

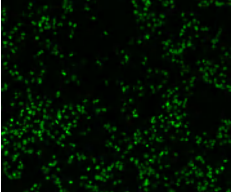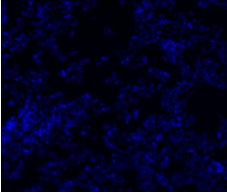

Cel 4  $\mu$ M + NAC 5 mM

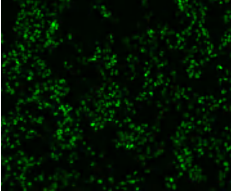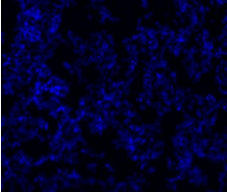

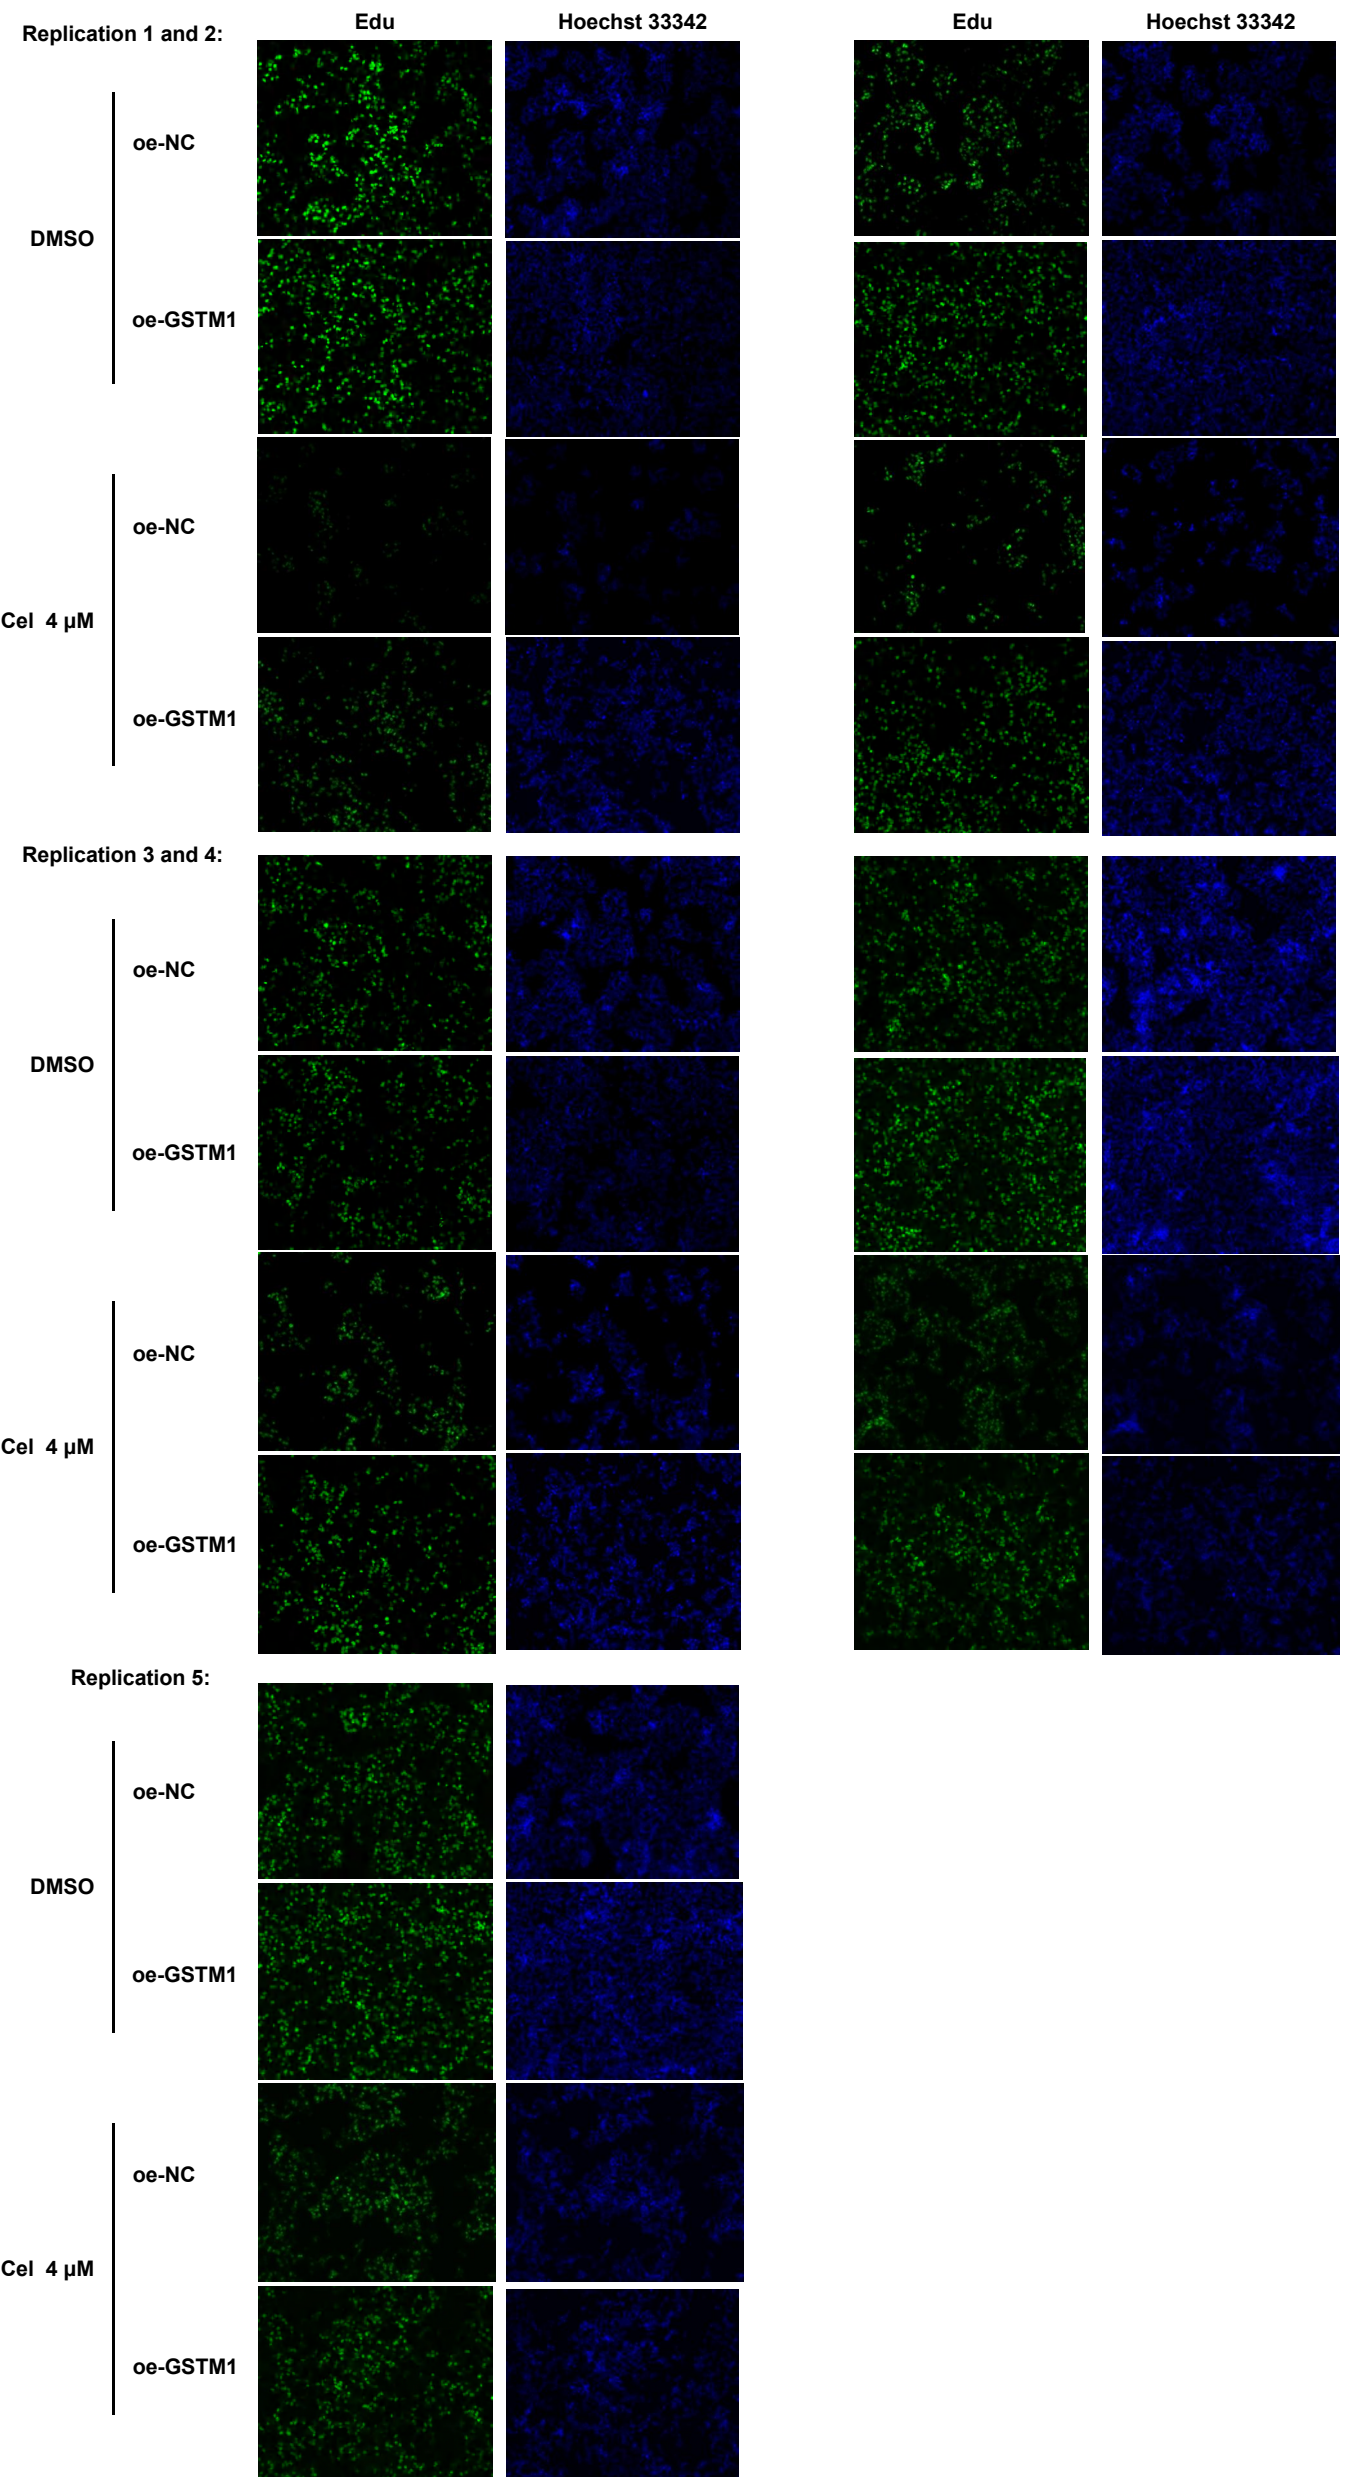

**Figure S4. WB raw data**

|                  |   |   |   |   |   |   |   |   |   |
|------------------|---|---|---|---|---|---|---|---|---|
| DMSO             | - | + | - | - | - | - | - | - | - |
| Cel 2 $\mu$ M    | - | - | + | - | + | + | + | - | - |
| Cel 4 $\mu$ M    | - | - | - | + | - | - | - | + | + |
| Fer-1 10 $\mu$ M | - | - | - | - | + | - | - | + | - |
| DFO 100 $\mu$ M  | - | - | - | - | - | + | - | - | + |
| NAC 5 mM         | - | - | - | - | - | - | + | - | + |

Marker: Thermo Fisher #26616

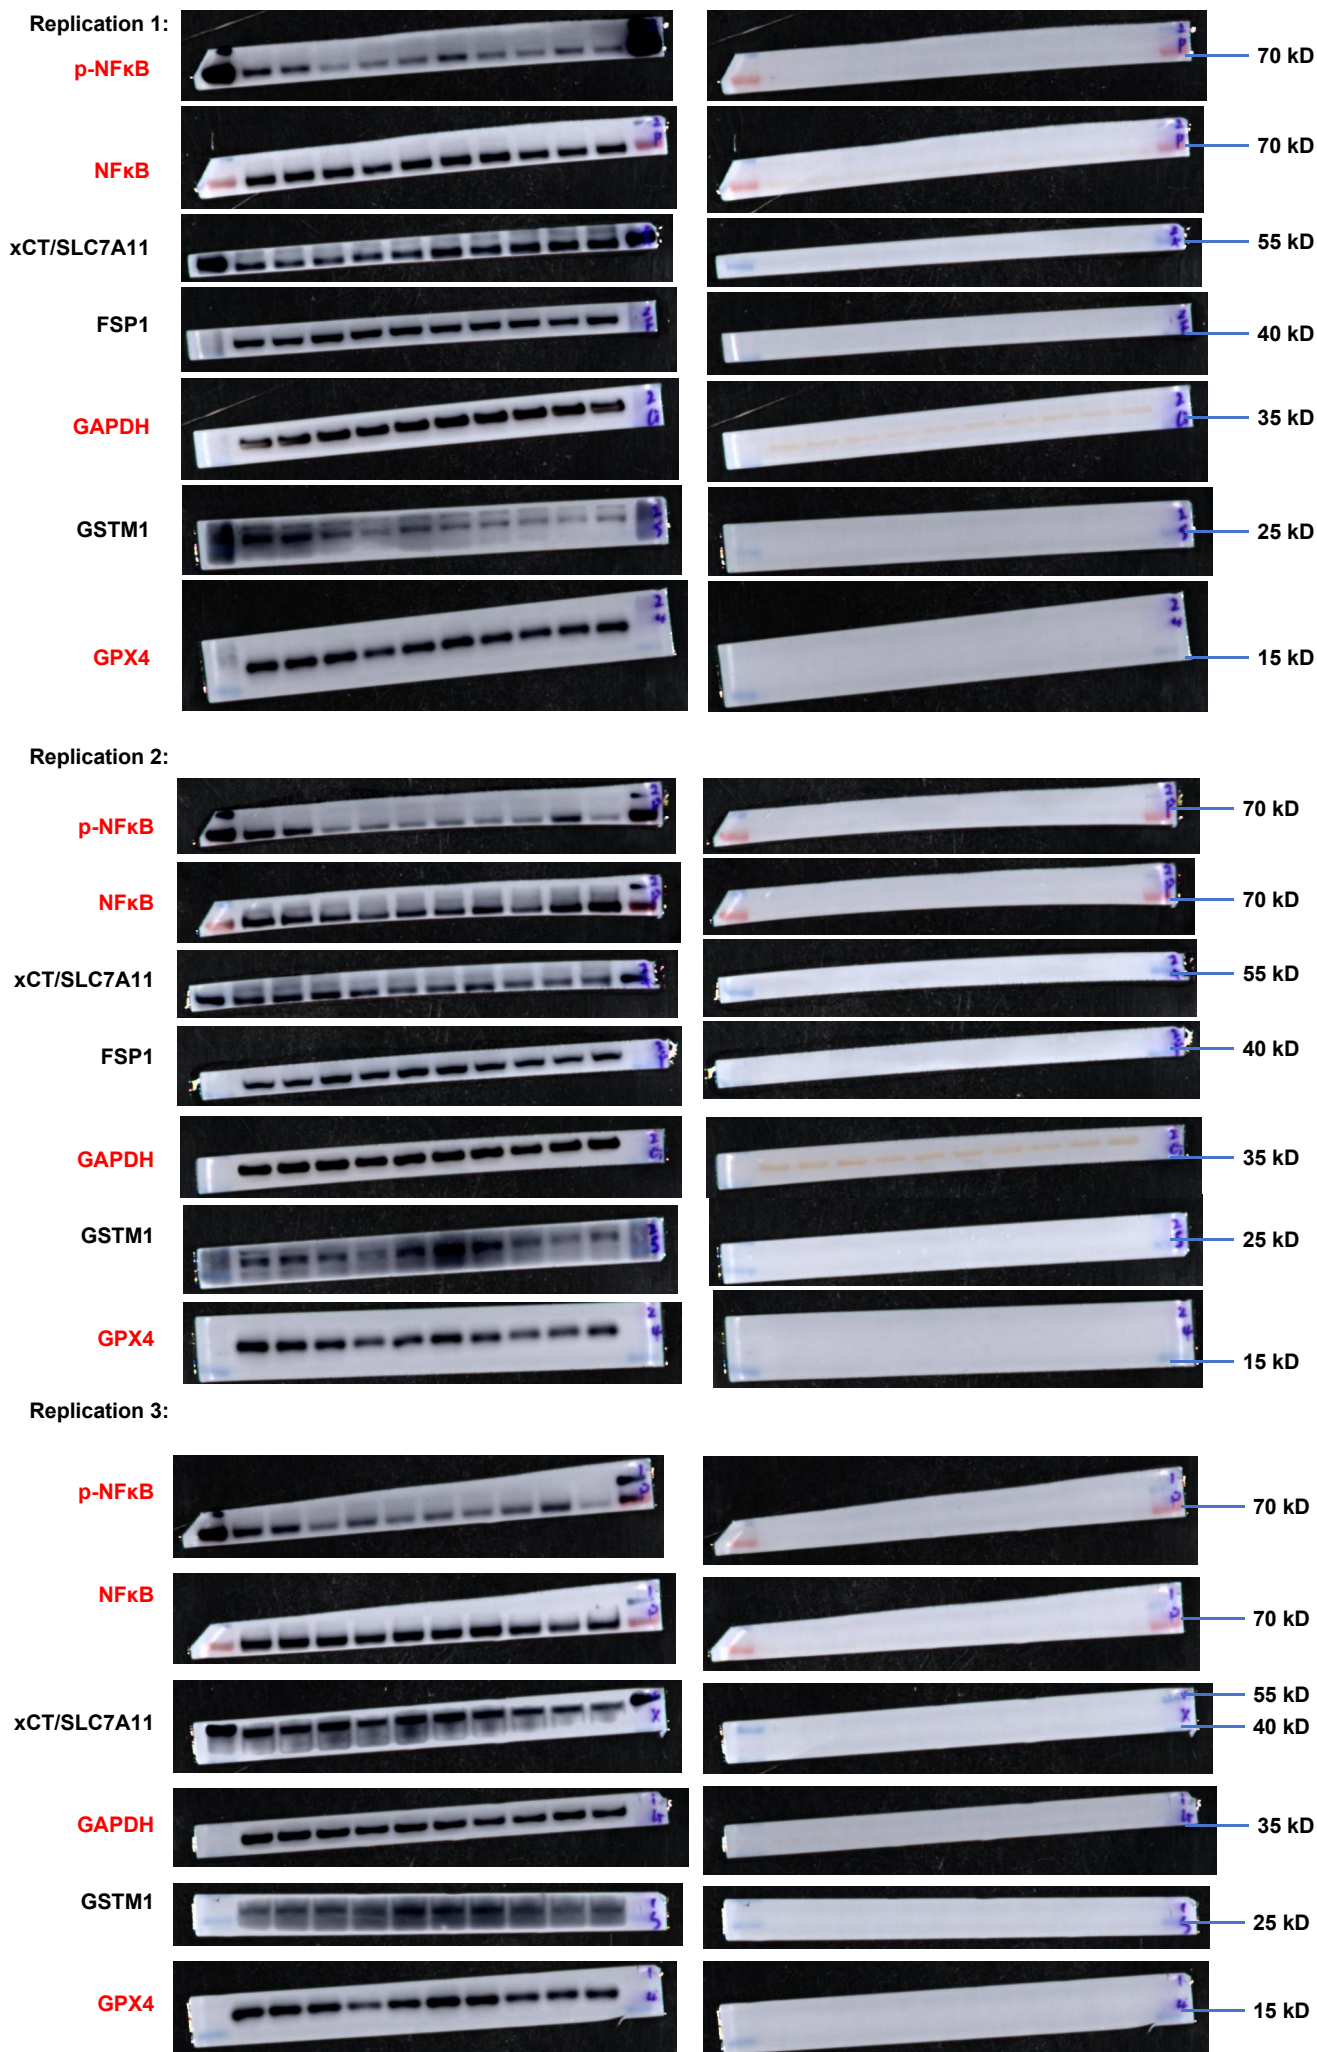

|                  |   |   |   |   |   |   |   |   |   |   |
|------------------|---|---|---|---|---|---|---|---|---|---|
| DMSO             | - | + | - | - | - | - | - | - | - | - |
| Cel 2 $\mu$ M    | - | - | + | - | + | + | + | - | - | - |
| Cel 4 $\mu$ M    | - | - | - | + | - | - | - | + | + | + |
| Fer-1 10 $\mu$ M | - | - | - | - | + | - | - | + | - | - |
| DFO 100 $\mu$ M  | - | - | - | - | - | + | - | - | + | - |
| NAC 5 mM         | - | - | - | - | - | - | + | - | - | + |

Marker: Thermo Fisher #26616

Replication 4:

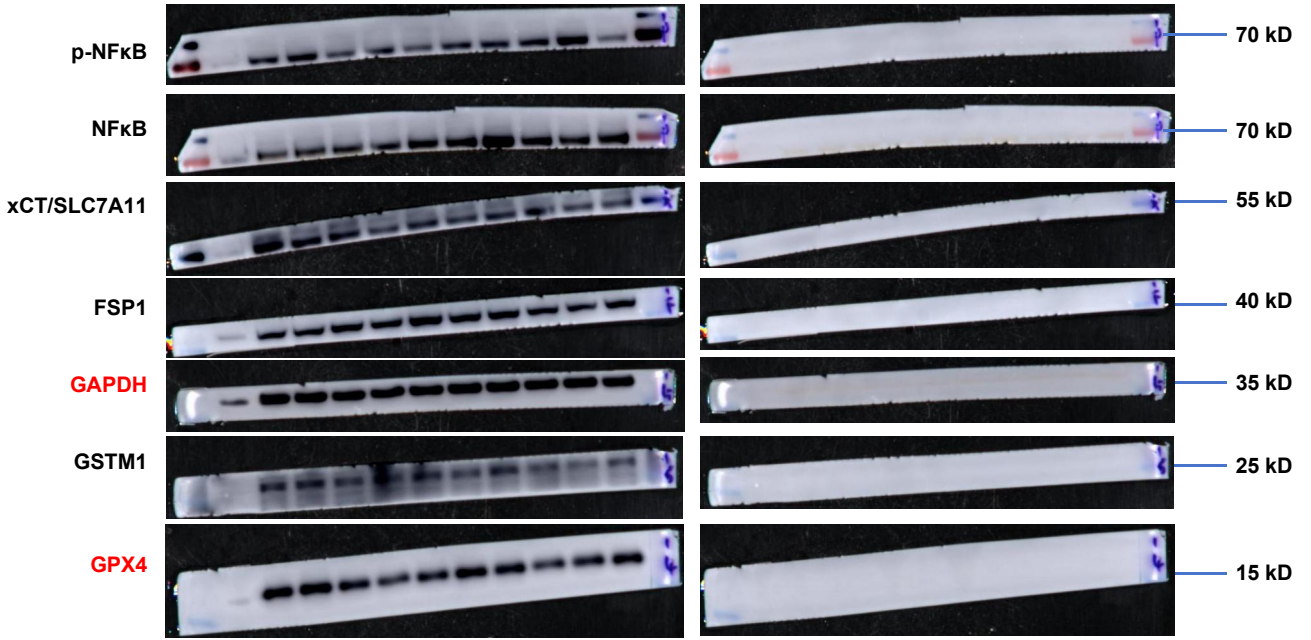

Replication 5:

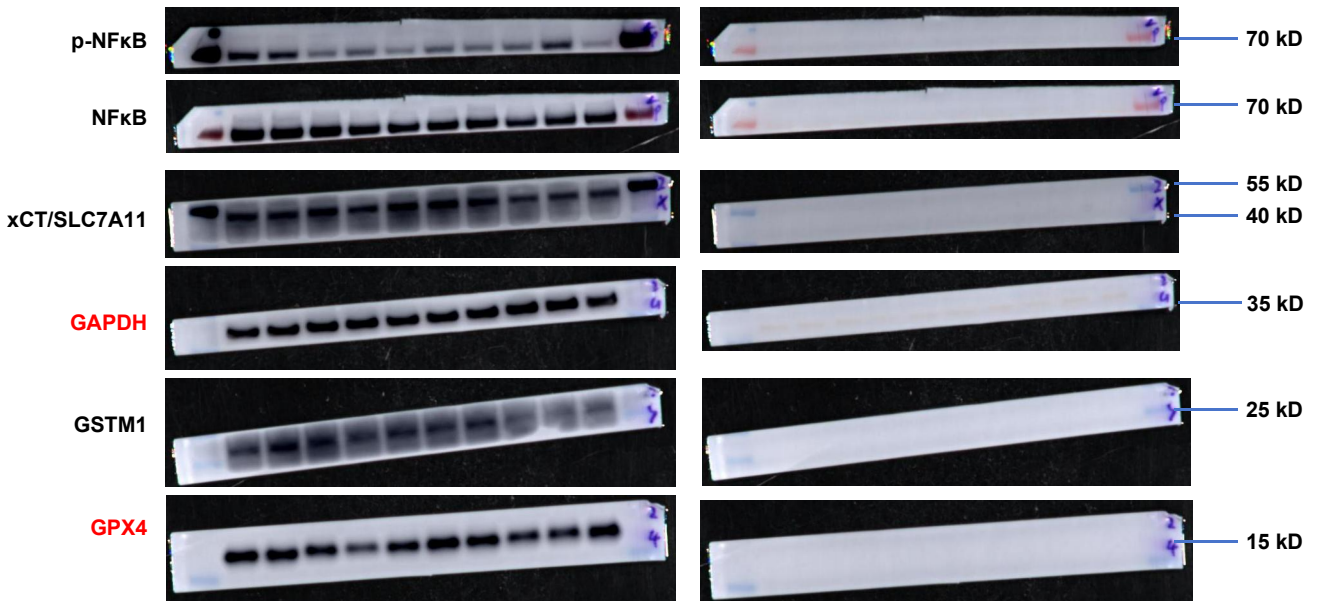

|                    |   |   |   |   |   |
|--------------------|---|---|---|---|---|
| DMSO               | + | - | - | - | - |
| Erastin 10 $\mu$ M | - | + | - | - | - |
| RSL3 10 $\mu$ M    | - | - | + | - | - |
| Cel 2 $\mu$ M      | - | - | - | + | - |
| Cel 4 $\mu$ M      | - | - | - | - | + |

Marker: Thermo Fisher #26616

Replication 1:

Replication 2:

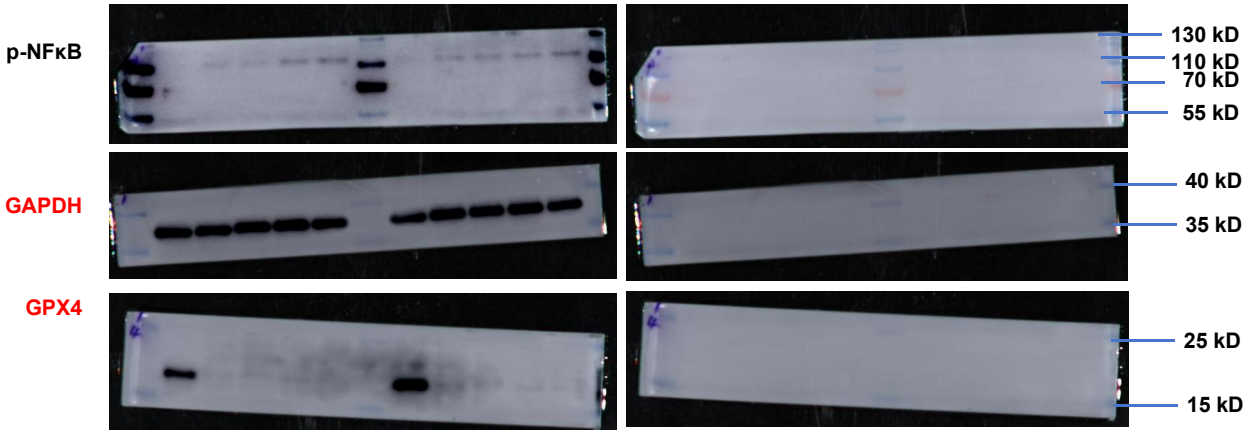

Replication 3:

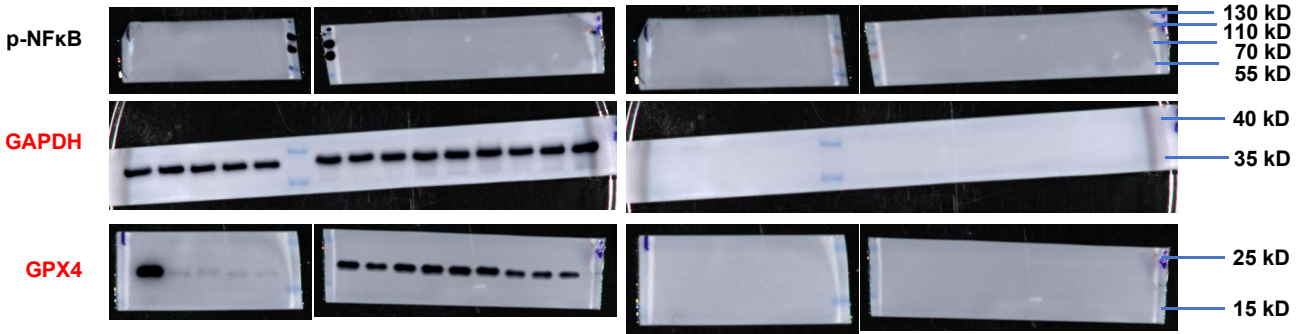

Replication 4:

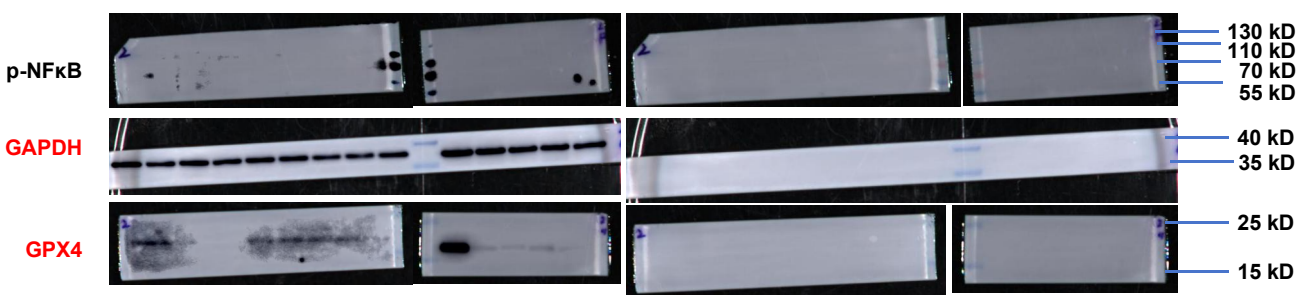

Replication 5:

Replication 6:

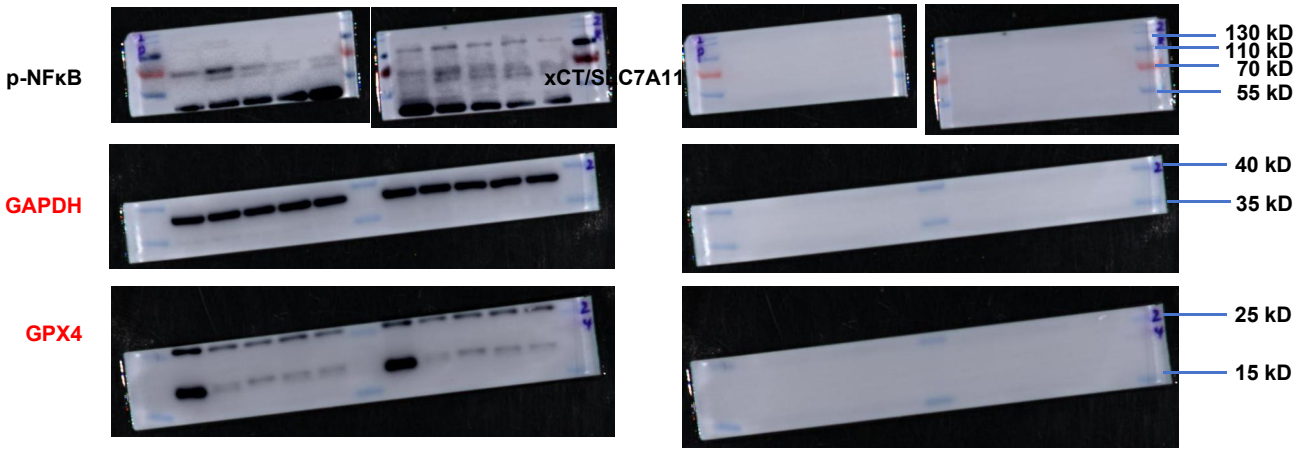

DMSO + - + - + - + - + - + -  
 Cel 4  $\mu$ M - + - + - + - + - + - +

Marker: Thermo Fisher #26616

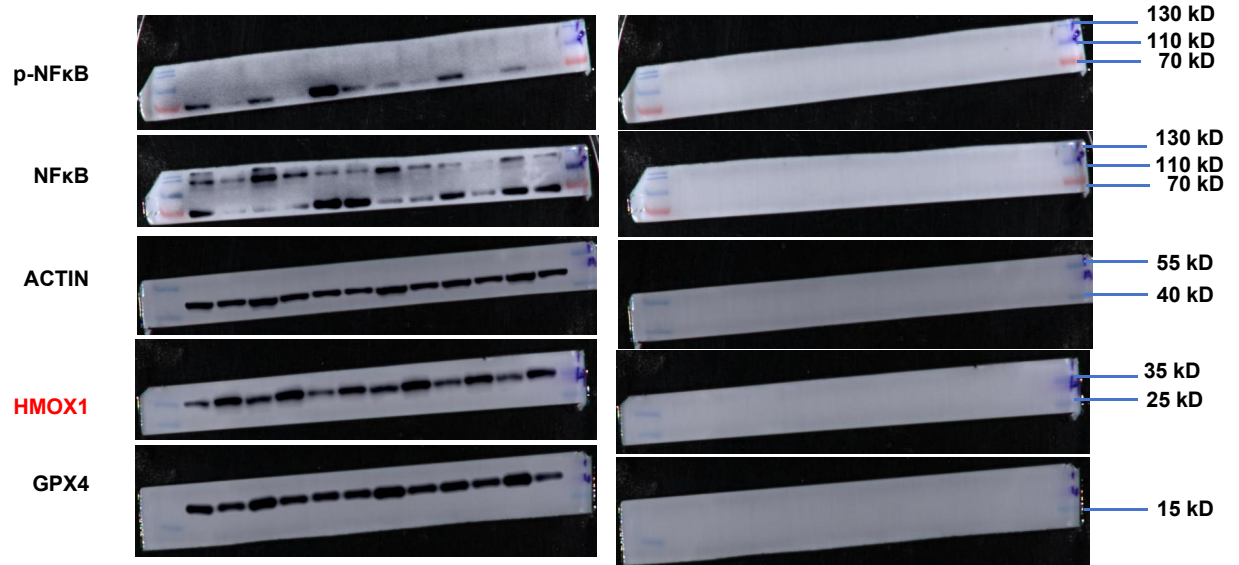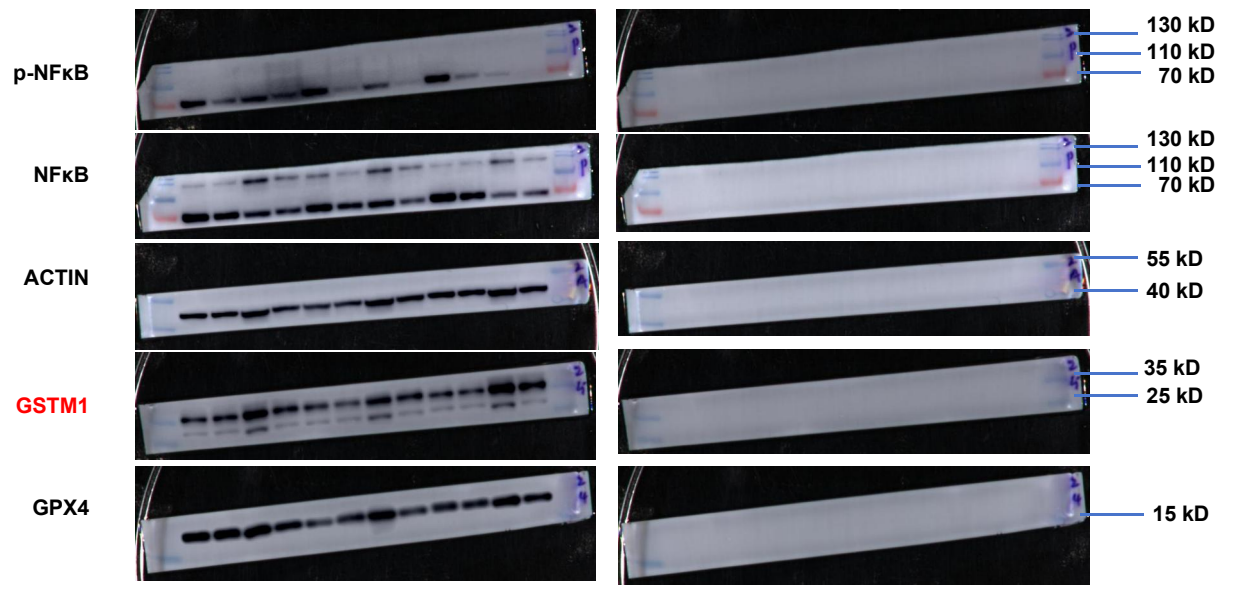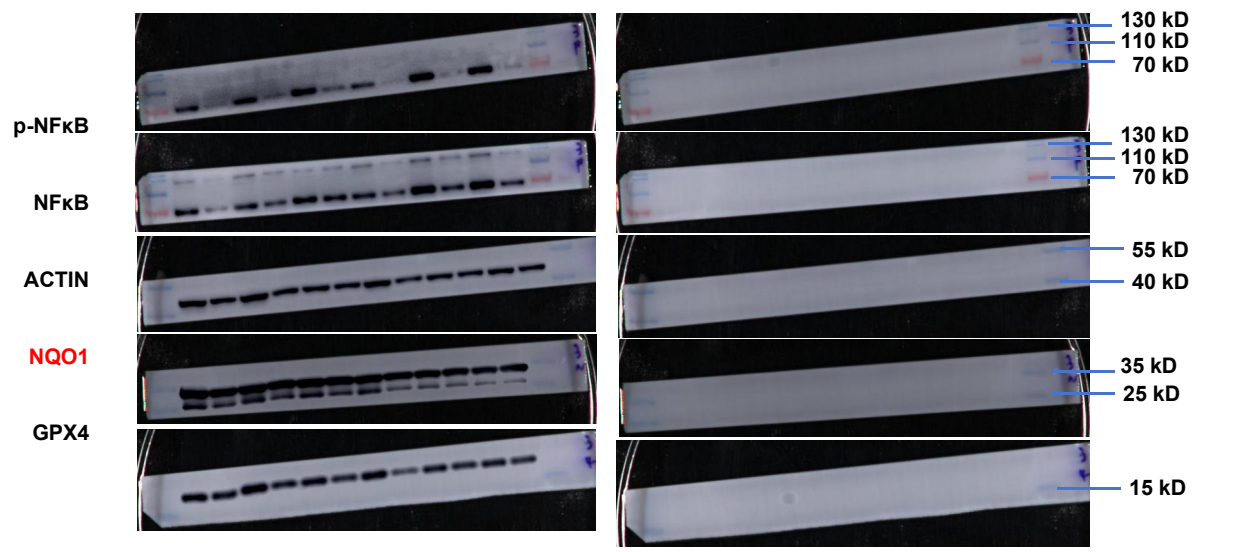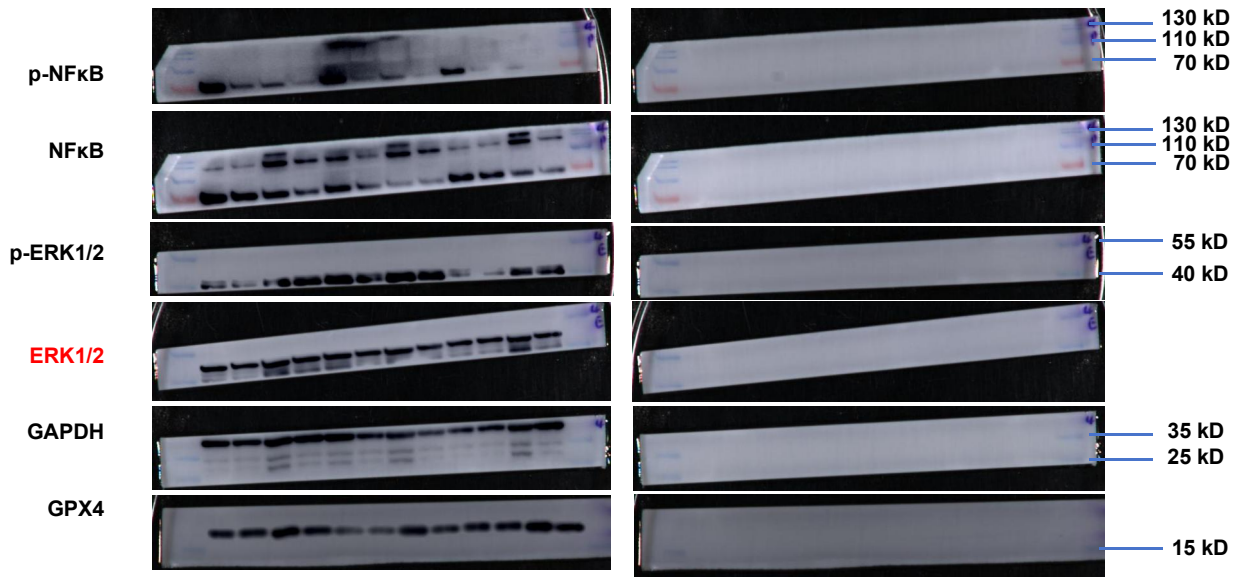

Marker: Thermo Fisher #26616

Marker: ABclonal #RM19001

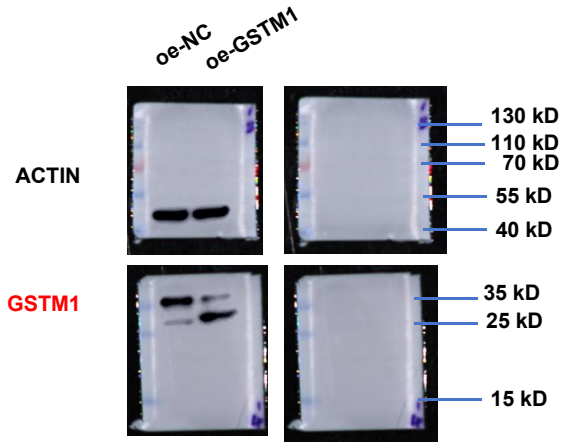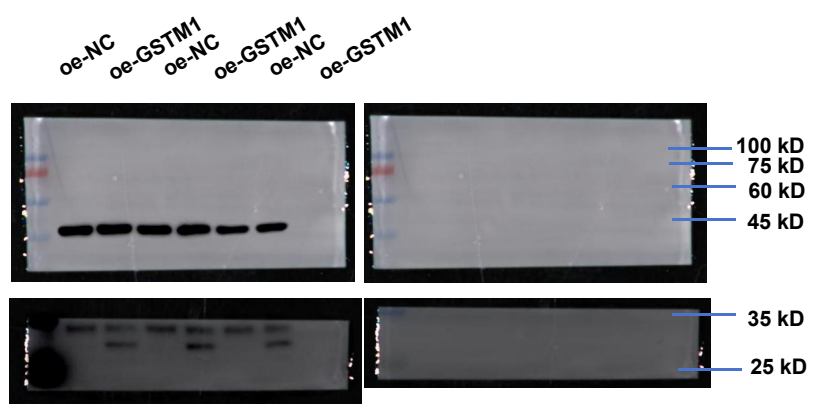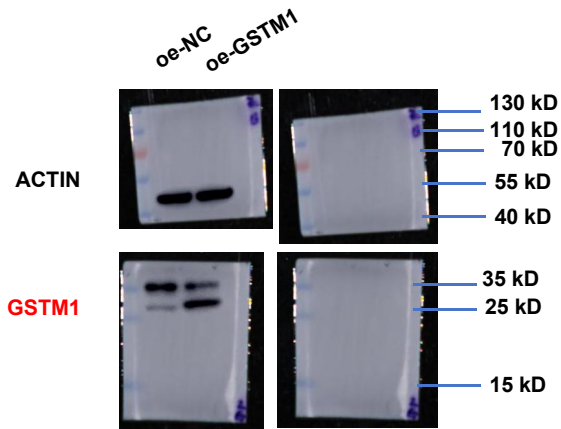

**Supplementary File 1.** Differential expression heat maps of 31 candidate genes in HCC and adjacent tissues and OS survival analysis forest maps of these genes

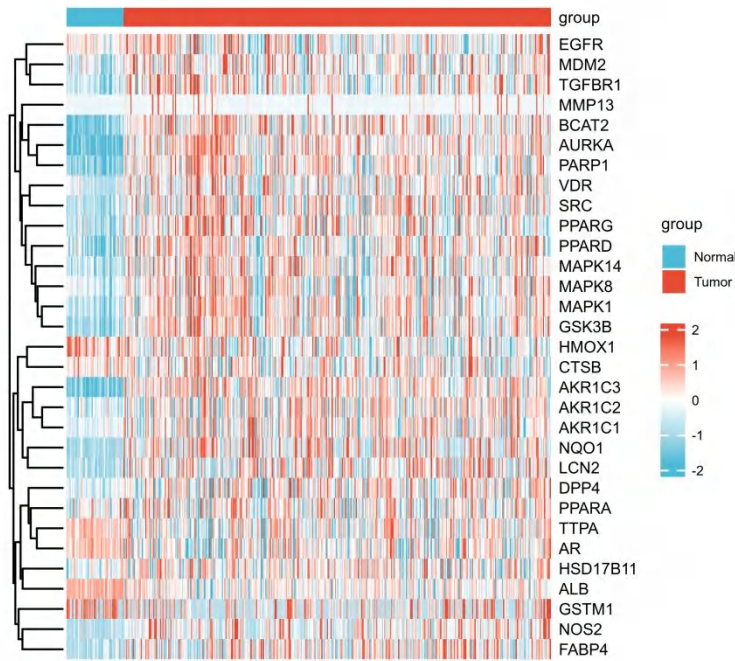

| Characteristics | Total(N) | HR (95% CI)           |  | P value |
|-----------------|----------|-----------------------|--|---------|
| VDR             | 373      | 1.193 (1.006 - 1.416) |  | 0.043   |
| PPARD           | 373      | 1.295 (1.072 - 1.566) |  | 0.007   |
| NOS2            | 373      | 0.974 (0.750 - 1.266) |  | 0.845   |
| MMP13           | 373      | 1.221 (0.888 - 1.678) |  | 0.219   |
| PPARA           | 373      | 1.002 (0.831 - 1.209) |  | 0.98    |
| MDM2            | 373      | 1.116 (0.889 - 1.400) |  | 0.345   |
| DPP4            | 373      | 1.014 (0.888 - 1.158) |  | 0.833   |
| HSD17B11        | 373      | 1.031 (0.850 - 1.250) |  | 0.758   |
| MAPK8           | 373      | 1.306 (0.961 - 1.775) |  | 0.088   |
| BCAT2           | 373      | 1.137 (0.958 - 1.349) |  | 0.142   |
| PPARG           | 373      | 1.268 (1.074 - 1.498) |  | 0.005   |
| AKR1C2          | 373      | 1.050 (0.955 - 1.153) |  | 0.313   |
| AURKA           | 373      | 1.282 (1.112 - 1.477) |  | < 0.001 |
| SRC             | 373      | 1.206 (1.055 - 1.378) |  | 0.006   |
| MAPK14          | 373      | 1.167 (0.900 - 1.513) |  | 0.245   |
| CTSB            | 373      | 1.310 (1.060 - 1.620) |  | 0.013   |
| AKR1C1          | 373      | 1.087 (0.974 - 1.213) |  | 0.138   |
| FABP4           | 373      | 0.901 (0.816 - 0.995) |  | 0.039   |
| TGFB1           | 373      | 1.210 (0.976 - 1.500) |  | 0.082   |
| LCN2            | 373      | 1.013 (0.958 - 1.072) |  | 0.641   |
| AKR1C3          | 373      | 1.323 (1.119 - 1.564) |  | 0.001   |
| ALB             | 373      | 0.926 (0.858 - 1.000) |  | 0.049   |
| TTPA            | 373      | 0.927 (0.845 - 1.018) |  | 0.112   |
| AR              | 373      | 0.872 (0.783 - 0.972) |  | 0.014   |
| GSK3B           | 373      | 1.577 (1.149 - 2.163) |  | 0.005   |
| PARP1           | 373      | 1.310 (1.051 - 1.633) |  | 0.017   |



## Supplementary File 2. The Proof of Ethical Exemption

### 证 明

我院中心实验室研究生蔡邦兰的开题项目“网络药理学结合体外实验验证雷公藤红素通过铁死亡治疗肝细胞癌的作用”。该课题计划自2021年11月28日至2024年6月30日执行。

经审查，该课题不涉及到人的临床研究，免于伦理审查。

特此证明！

上海市浦东新区公利医院伦理委员会  
医学伦理委员会  
二〇二四年二月四日

Given that our Proof of Ethical Exemption is in Chinese, we have translated it for readability, as follows.

#### Certificate

This is to certify that the research project titled "Integrating network pharmacology with in vitro experiments to validate the efficacy of celastrol against hepatocellular carcinoma through ferroptosis," initiated by graduate student Banglan Cai in our Shanghai Health Commission Key Lab of Artificial Intelligence (AI)-Based Management of Inflammation and Chronic Diseases, is scheduled to be executed from November 28, 2021, to June 30, 2024. Upon review, it has been determined that the project does not involve clinical research on human subjects and is thereby exempt from ethical review.

Ethics Committee,  
Pudong Gongli Hospital,  
Shanghai, China  
2024.2.4

## Supplementary Table S1

| Antibody                     | Company                   | Catalog number |
|------------------------------|---------------------------|----------------|
| p-NFκB p65                   | Cell signaling technology | # 3033S        |
| NFκB                         | Cell signaling technology | # 8242S        |
| GPX4                         | Cell signaling technology | #52455S        |
| xCT/SLC7A11                  | Proteintech               | 26864-1-AP     |
| FSP1                         | Cell signaling technology | #24972S        |
| GSTM1                        | Sangon Biotech            | D126782-0025   |
| HMOX1                        | Sangon Biotech            | D220756-0025   |
| NQO1                         | Sangon Biotech            | D161049-0025   |
| Phospho-p44/42 MAPK (Erk1/2) | Cell signaling technology | #9101S         |
| p44/42 MAPK (Erk1/2)         | Cell signaling technology | #9102S         |
| GAPDH                        | Sangon Biotech            | D190090-0200   |

## Supplementary Table S2

Ligand Interactions Report

Thu Apr 20 09:27:03 2023 (MOE 2022.02)

7BEU: TRANSFERASE / 7BEU Browser

| Ligand |   |     | Receptor |     |     | Interaction | Distance | E (kcal/mol) |
|--------|---|-----|----------|-----|-----|-------------|----------|--------------|
| 0      | 1 | OD1 | ASN      | 58  | (B) | H-donor     | 3.15     | -1.3         |
| 0      | 3 | NF2 | HIS      | 107 | (B) | H-donor     | 3.03     | -2.6         |
| 0      | 1 | NE1 | TRP      | 45  | (B) | H-acceptor  | 3.15     | -0.5         |
| 0      | 2 | NE1 | TRP      | 45  | (B) | H-acceptor  | 3.30     | -1.4         |
| 0      | 2 | NZ  | LYS      | 49  | (B) | H-acceptor  | 3.01     | -2.5         |

## **Supplementary materials' legends**

Supplementary fig.1. ROS raw data.

Supplementary fig.2. Clone formation raw data.

Supplementary fig.3. Edu raw data.

Supplementary fig.4. WB raw data.

Supplementary file.1. Differential expression heat maps of 31 candidate genes in HCC and adjacent tissues and OS survival analysis forest maps of these genes

Supplementary file.2. The Proof of Ethical Exemption in Chinese and English.

Supplementary Table.1. Antibodies information used in Western blot.

Supplementary Table.2. Molecular docking results between celastrol and GSTM1.
